# Supplementary material for: Constructing asymmetrical dual catalytic sites in manganese oxides enables fast and stable lithium–oxygen catalysis
Source: Royal Society of Chemistry journal article supplement (doi:10.1039/d2ta07232g), 2022-12-12
Supplement: d2ta07232g1.pdf [file d2ta07232g1.pdf]

Electronic Supplementary Material (ESI) for Journal of Materials Chemistry A.

This journal is © The Royal Society of Chemistry 2022

## **Electronic Supplementary Information**

### **Constructing asymmetrical dual catalytic sites in manganese oxides enables fast and stable lithium-oxygen catalysis**

Bo Liu, Xinmiao Liu, Cong Wei, Ya Zhou, Zixuan Zhu, Xin Lei, Yanyan Fang, Yida Zhang, Jun Liu\*, Yitai Qian and Gongming Wang\*

## Experimental Section

*Surface models:* Based on XRD and HR-TEM characterization results, the catalyst surface models were based on the (200) oriented surface of the Ru SAs@MnO<sub>2</sub> crystal structure. Furthermore, combined with fine structure characterization (HAADF-STEM and XANES), the tendency of Ru SAs to replace Mn on the MnO<sub>2</sub> surface was considered. We model the Ru SAs@MnO<sub>2</sub> catalyst by replacing surface Mn atom with a Ru atom on the MnO<sub>2</sub>(100) surface, denoted as Ru SAs@MnO<sub>2</sub>(100). A four-layer,  $p(1 \times 4)$  Ru SAs@MnO<sub>2</sub>(100), where each layer includes 8 Mn atoms and 16 O atoms (see Fig. S15<sup>†</sup>). In addition, MnO<sub>2</sub>(100) surfaces of the same size were constructed for comparison. Furthermore, the repeated slabs were separated from their neighboring images by a 15 Å width vacuum in the direction perpendicular to the surface. In all calculations, the bottom two layers (including 32 oxygen atoms and 16 manganese atoms) were fixed to their buck positions and the other layers with the adsorbed species were allowed to relax.

### Supplementary Figures

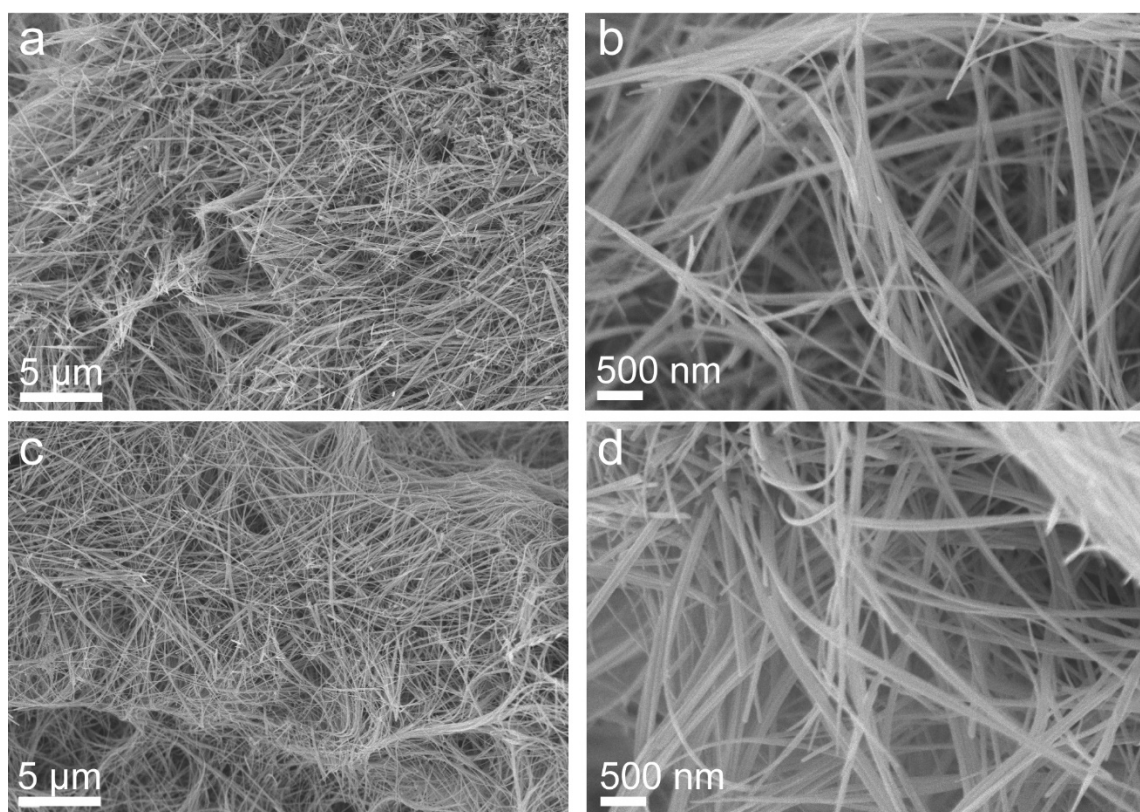

**Fig. S1** SEM images of (a, b)  $\text{MnO}_2$  nanowires, and (c, d) Ru SAs@ $\text{MnO}_2$ , respectively.

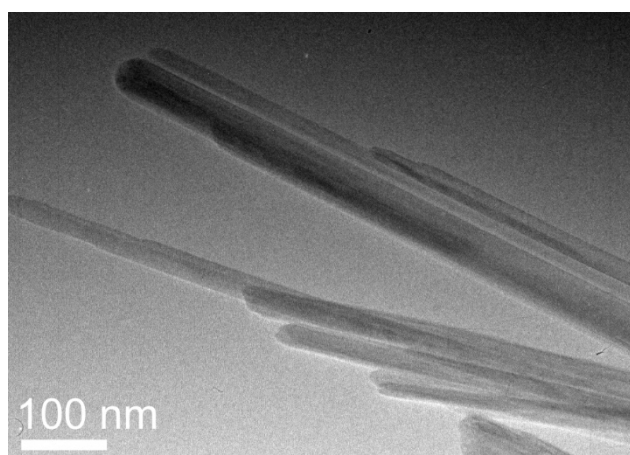

**Fig. S2** The TEM image of Ru SAs@MnO<sub>2</sub>.

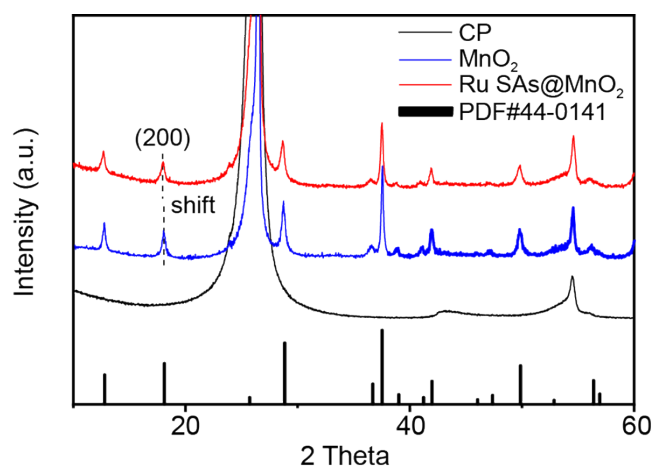

**Fig. S3** XRD patterns of Ru SAs@MnO<sub>2</sub>, MnO<sub>2</sub>, and CP samples.

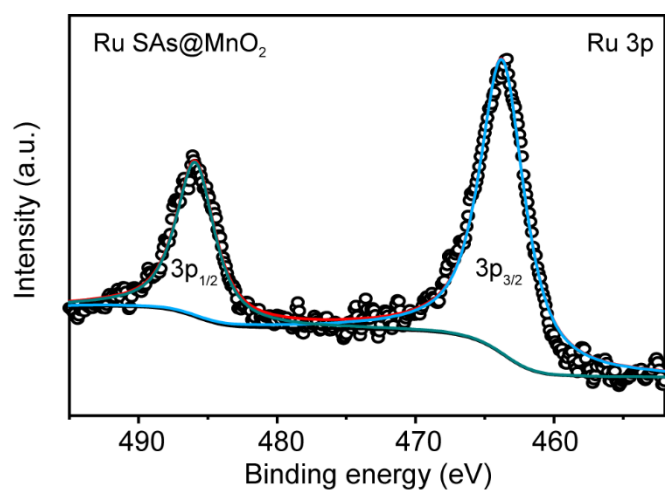

**Fig. S4** The high-resolution XPS spectrum of Ru 3p in Ru SAs@MnO<sub>2</sub> sample.

For the Ru SAs@MnO<sub>2</sub> sample, the peaks of Ru 3p<sub>3/2</sub> and Ru 3p<sub>1/2</sub> located at 463.7 and 485.9 eV, respectively, revealing the oxidation state of Ru species.<sup>[1, 2]</sup>

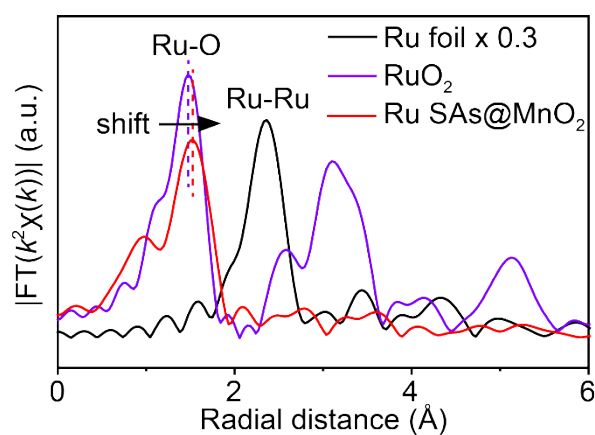

**Fig. S5** The normalized Ru K-edge FT-EXAFS spectra of Ru foil, RuO<sub>2</sub>, and Ru SAs@MnO<sub>2</sub>.

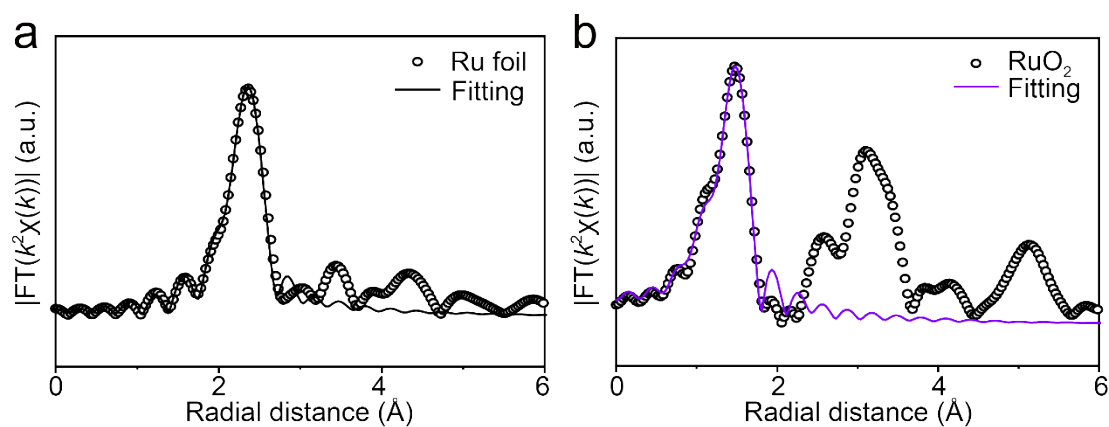

**Fig. S6** The fitting of FT-EXAFS spectra of Ru foil and RuO<sub>2</sub> in R space.

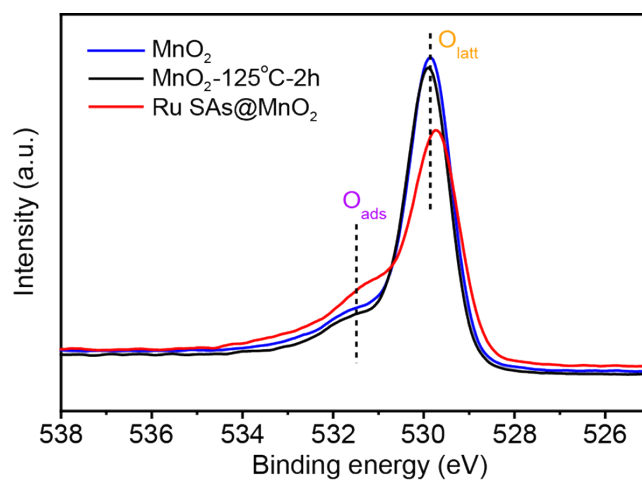

**Fig. S7** The high-resolution XPS spectrum of O 1s in Ru SAs@MnO<sub>2</sub>, MnO<sub>2</sub> and MnO<sub>2</sub> annealed under the same conditions without Ru source.

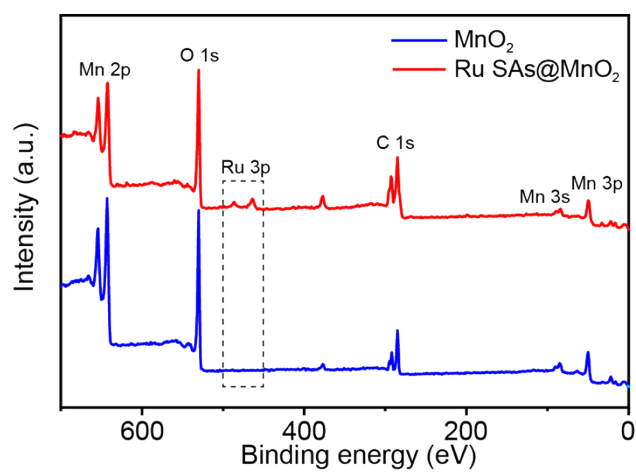

**Fig. S8** XPS survey spectra of  $\text{Ru SAs@MnO}_2$  and  $\text{MnO}_2$  samples.

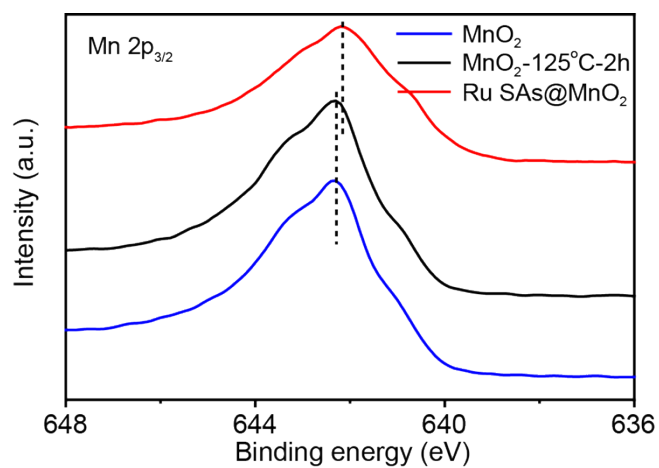

**Fig. S9** The high-resolution  $\text{Mn } 2p_{3/2}$  XPS spectra of  $\text{Ru SAs@MnO}_2$ ,  $\text{MnO}_2$  and  $\text{MnO}_2$  annealed under the same conditions without Ru source.

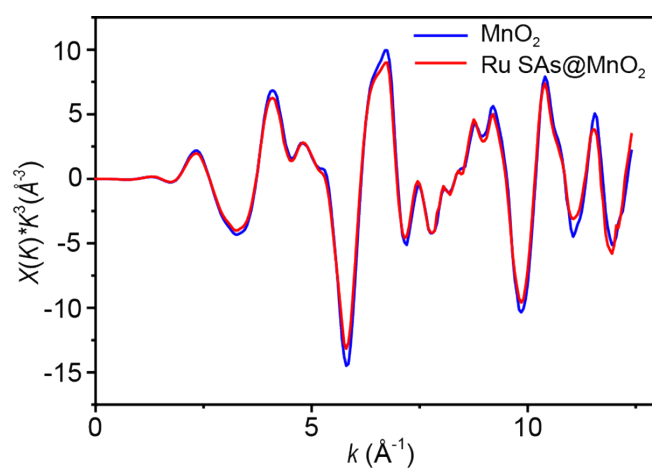

**Fig. S10** FT-EXAFS curves at k space for Ru SAs@MnO<sub>2</sub> and MnO<sub>2</sub> samples.

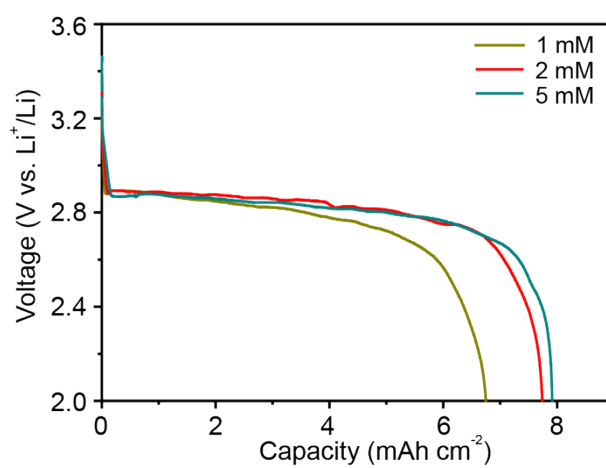

**Fig. S11** The galvanostatic voltage profiles of the Ru SAs@MnO<sub>2</sub> prepared by 1 mM, 2 mM, and 5 mM  $\text{RuCl}_3$  concentrations during deep discharge process a current density of 0.05 mA  $\text{cm}^{-2}$ .



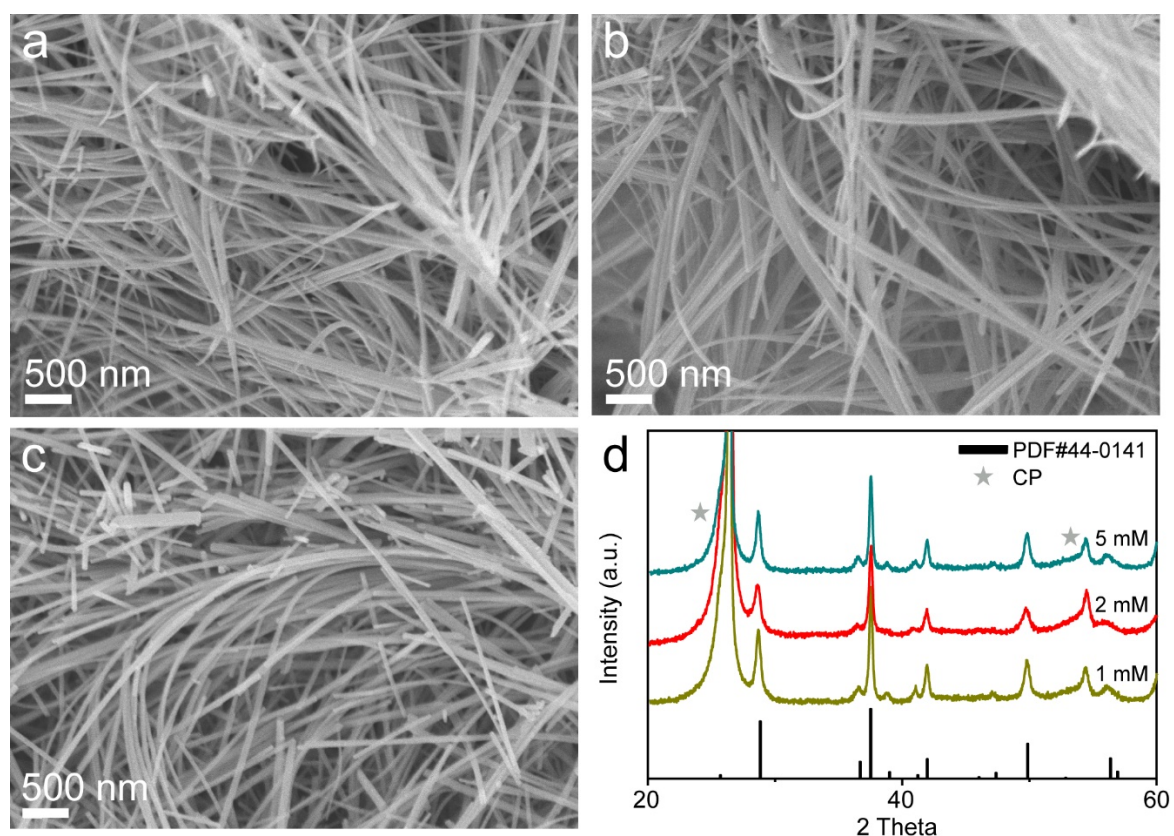

**Fig. S12** SEM images of the Ru SAs@MnO<sub>2</sub> prepared by (a) 1 mM, (b) 2 mM, and (c) 5 mM RuCl<sub>3</sub> concentrations, respectively. (d) The corresponding XRD patterns of above samples.

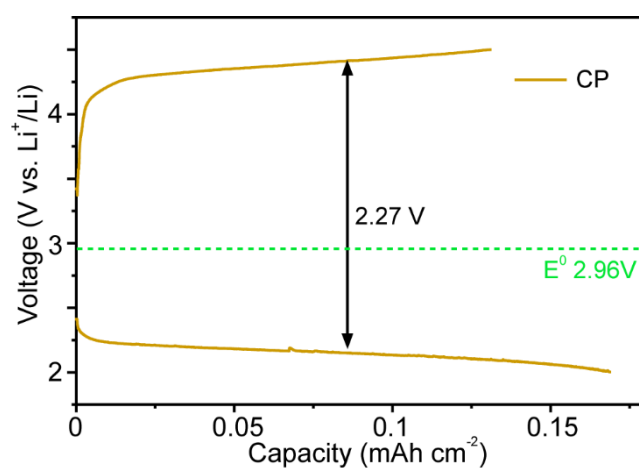

**Fig. S13** The deep discharge/charge curves of CP collected at a current density of  $0.1 \text{ mA cm}^{-2}$

1.

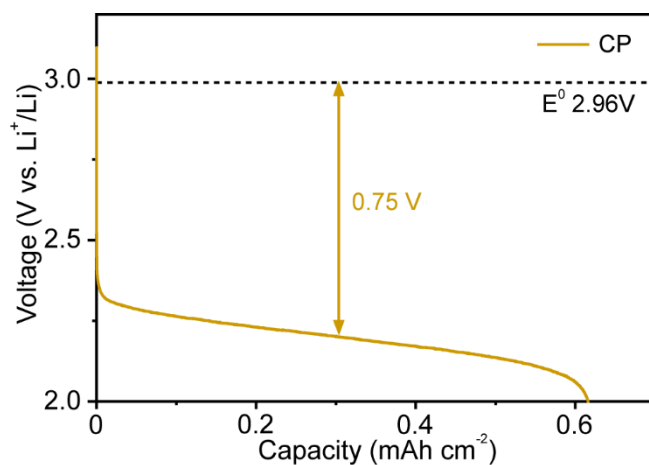

**Fig. S14** The galvanostatic voltage profiles of the CP during deep discharge process a current density of  $0.05 \text{ mA cm}^{-2}$ .

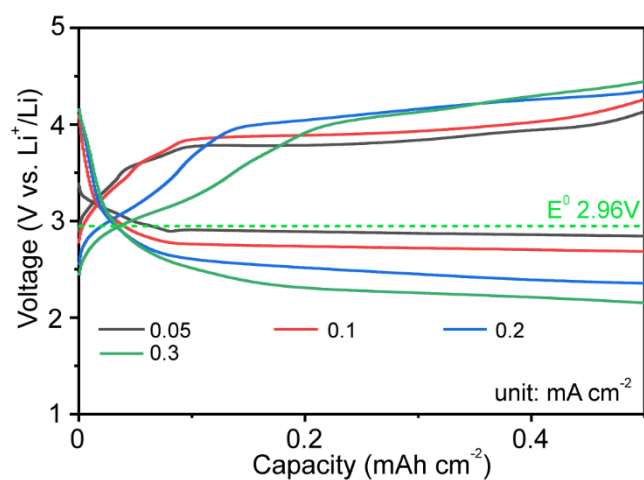

**Fig. S15** The discharge/charge curves of  $\text{MnO}_2$  collected at various current densities under a curtailing capacity of  $0.5 \text{ mAh cm}^{-2}$ .

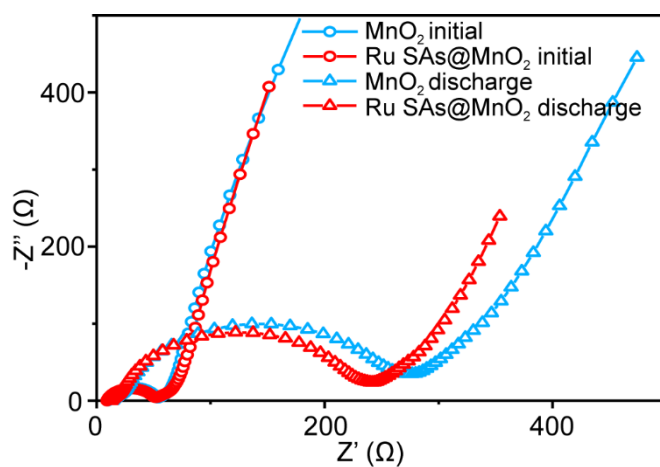

**Fig. S16** The cycling performance of  $\text{Ru SAs@MnO}_2$  and  $\text{MnO}_2$  electrodes at a current density of  $0.1 \text{ mA cm}^{-2}$  under a cut-off capacity of  $1 \text{ mAh cm}^{-2}$ .

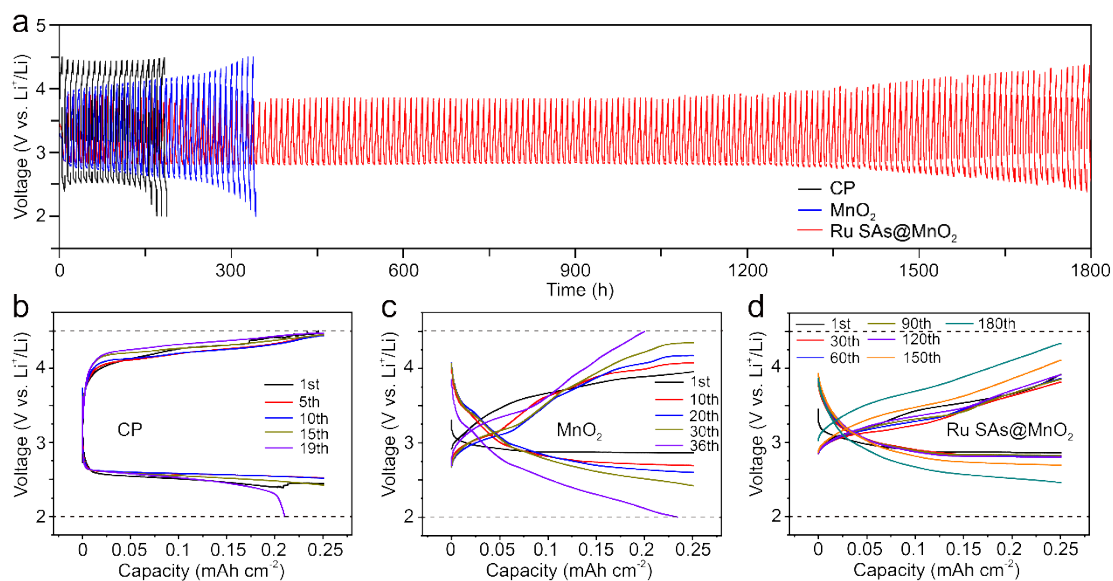

**Fig. S17** (a) Voltage versus time curves of Ru SAs@ $\text{MnO}_2$ ,  $\text{MnO}_2$ , and CP electrodes collected at the current of  $0.05 \text{ mA cm}^{-2}$  with the cut-off capacity of  $0.25 \text{ mAh cm}^{-2}$ . The discharge–charge curves of (b) CP, (c)  $\text{MnO}_2$ , and (d) Ru SAs@ $\text{MnO}_2$  electrodes at various cycle numbers.

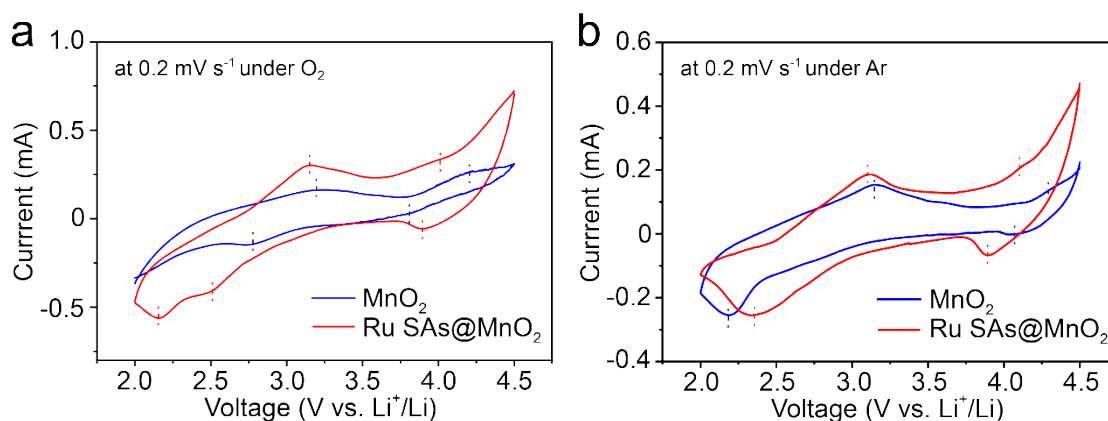

**Fig. S18** CV curves of Ru SAs@MnO<sub>2</sub> and MnO<sub>2</sub> electrodes collected at the scan rate of 0.2 mV s<sup>-1</sup> after 20 cycles.

As shown in Fig. S18a, although no additional redox peak appears, the CV curves of MnO<sub>2</sub> and Ru SAs@MnO<sub>2</sub> exhibit dramatic differences under O<sub>2</sub> atmosphere, especially in the cathodic region around 2.5 V, indicating huge differences in electrochemical behaviour, which are caused by the phase transition and dissolution of MnO<sub>2</sub>. This electrochemical behaviour induced by the phase transition will eventually lead to battery failure. In addition, the Ru SAs@MnO<sub>2</sub> holds much larger cathodic/anodic peak currents compared with MnO<sub>2</sub>, which can be attributed to the superior ORR/OER catalytic effect of the asymmetrical Mn-Ru dual-sites in the Ru SAs@MnO<sub>2</sub> electrode. Furthermore, the CV curves of different samples under Ar atmosphere also provided to exclude the effect of oxygen catalytic reaction (Fig. S18b). Apparently, the redox peak position of MnO<sub>2</sub> changes dramatically after 20 cycles, indicating an irreversible phase change. These results demonstrate the excellent stabilization and catalytic effect of asymmetrical Mn-Ru dual-sites on MnO<sub>2</sub> for ORR/OER reaction.

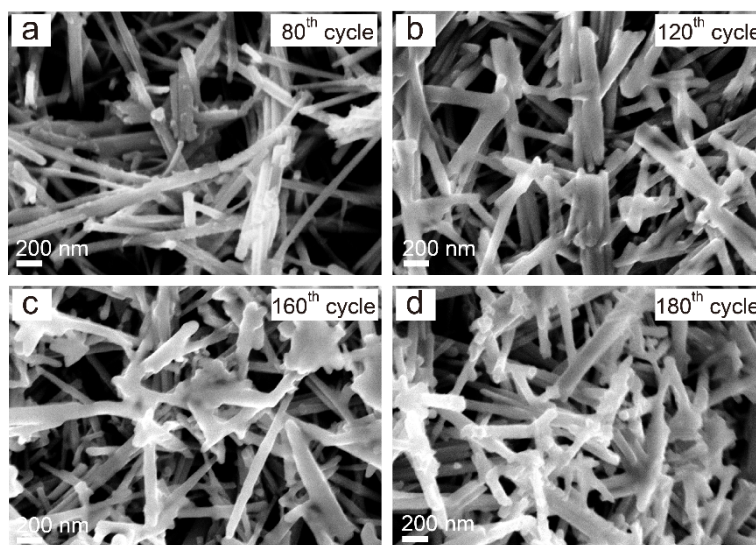

**Fig. S19** The SEM images of Ru SAs@MnO<sub>2</sub> collected after (a) 80, (b) 120, (c) 160, and (d) 180 cycles, respectively.

Apparently, the Ru SAs@MnO<sub>2</sub> maintains mainly the nanowire morphology even after 180 cycles, despite the presence of a small number of nanoparticles.

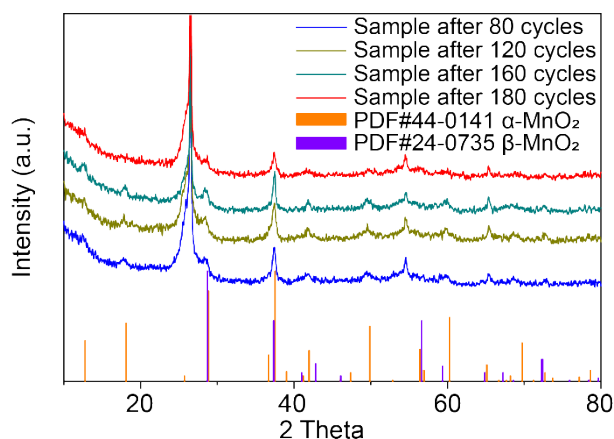

**Fig. S20** The XRD patterns of Ru SAs@MnO<sub>2</sub> collected after 80, 120, 160, 180 cycles.

The XRD results show that the crystal structure of the Ru SAs@MnO<sub>2</sub> nanowires can be well maintained as  $\alpha$ -MnO<sub>2</sub> during the cycling process. Notably, the peak intensity of Ru SAs@MnO<sub>2</sub> weakened after 180 cycles, indicating that the decay of the cyclic stability may be caused by structural degradation of MnO<sub>2</sub>.

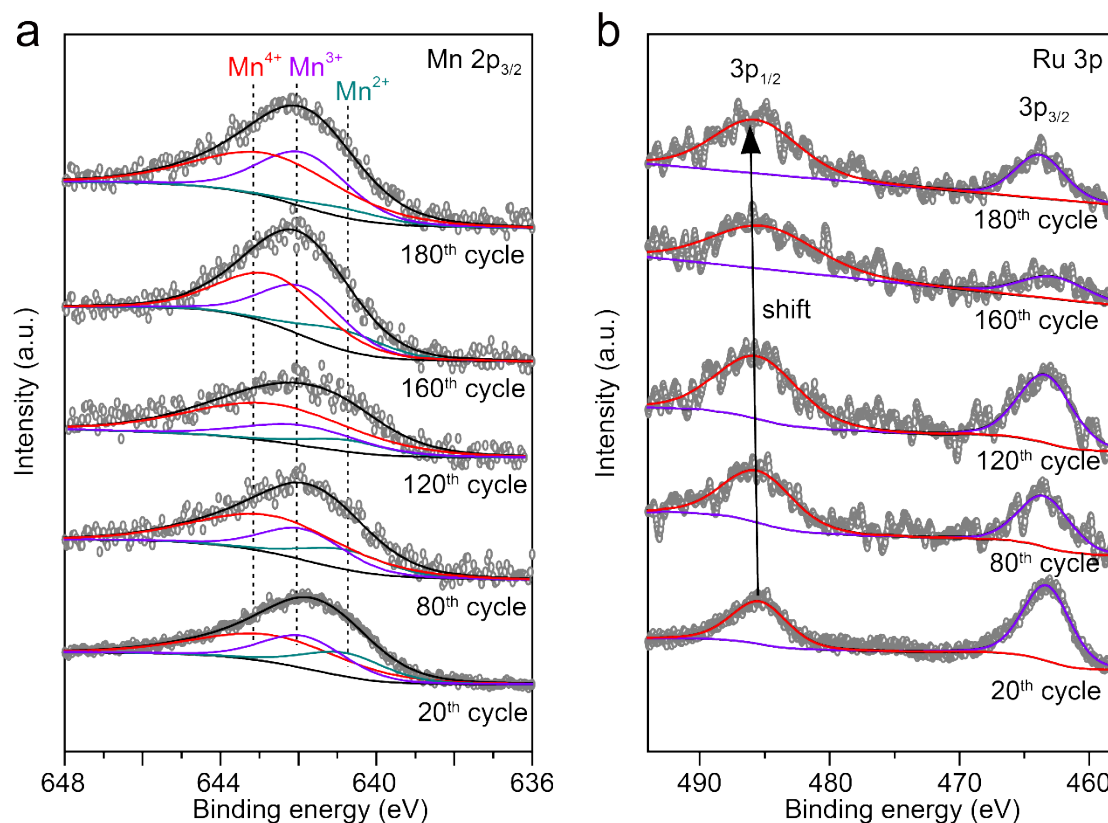

**Fig. S21** XPS core-level (a) Mn 2p<sub>3/2</sub> and (b) Ru 3p spectra of Ru SAs@MnO<sub>2</sub> collected after 20, 80, 120, 160, 180 cycles.

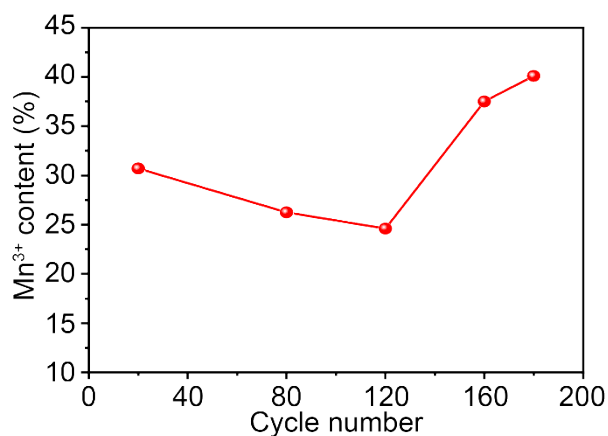

**Fig. S22** The Mn<sup>3+</sup> content of Ru SAs@MnO<sub>2</sub> collected after 20, 80, 120, 160, 180 cycles.

As shown in Fig. S18a, a small amount of Mn<sup>2+</sup> corresponding to 640.8 eV appears during the cycling in addition to Mn<sup>4+</sup> and Mn<sup>3+</sup>. Notably, the state of Mn<sup>4+</sup> is the main feature of Ru SAs@MnO<sub>2</sub> during the cycling process, indicating that the main component of Ru SAs@MnO<sub>2</sub>

is still  $\text{MnO}_2$ . Considering that the Jahn-Teller effect of the  $\text{Mn}^{3+}$  causes the structural degradation of the manganese oxides, we analyze in detail the evolution of the  $\text{Mn}^{3+}$  content on the surface of Ru SAs@ $\text{MnO}_2$  after various number of cycling tests (Fig. S19). Apparently, there is no significant change in  $\text{Mn}^{3+}$  content after 120 cycles, however, the surface  $\text{Mn}^{3+}$  content of Ru SAs@ $\text{MnO}_2$  increased significantly after 160 cycles, which corresponds to a significant performance decay at around 160 cycles, indicating that the decay of cycling stability of Ru SAs@ $\text{MnO}_2$  may be related to the increase in  $\text{Mn}^{3+}$  content. In addition, as shown in Fig. S18b, the Ru 3p signal was always existent during cycling, proving the stability of the Ru sites. It is noteworthy that Ru 3p shifts toward higher binding energy as the cycle proceeds, indicating a gradual rise in the oxidation state of Ru and a decrease in the average electron density around Ru sites, which may be due to the change in the electron density of the Mn sites.



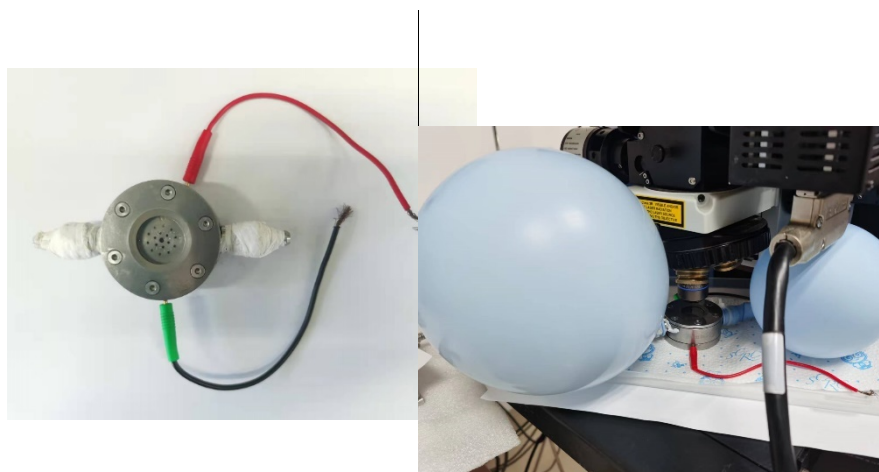

**Fig. S23** The photographs of the *operando* Raman devices for Li-O<sub>2</sub> cell.

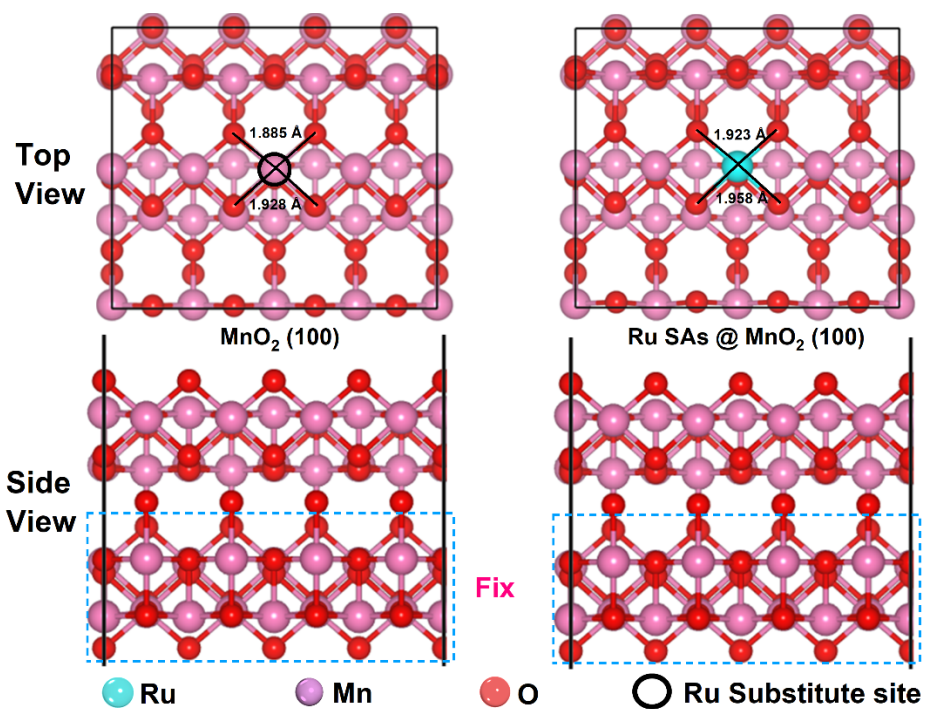

**Fig. S24** The configurations of Ru SAs@MnO<sub>2</sub>(100) and MnO<sub>2</sub>(100) surface with bond length information.

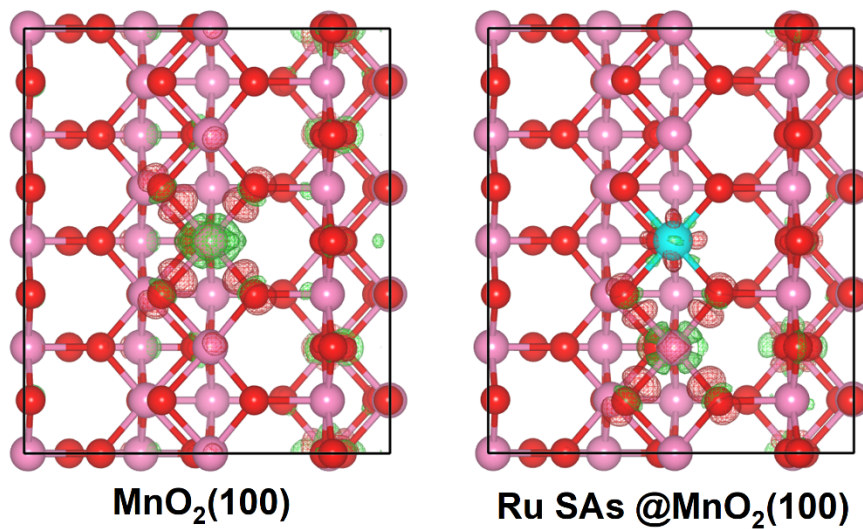

**Fig. S25** 3D charge density differences maps,  $\Delta\rho = \rho_{\text{slab}} - \rho_{\text{Mn}} - \rho_{\text{slab-Mn}}$ , on  $\text{MnO}_2(100)$  and Ru SAs@MnO<sub>2</sub>(100), respectively. blue stands for negative, red stands for positive.

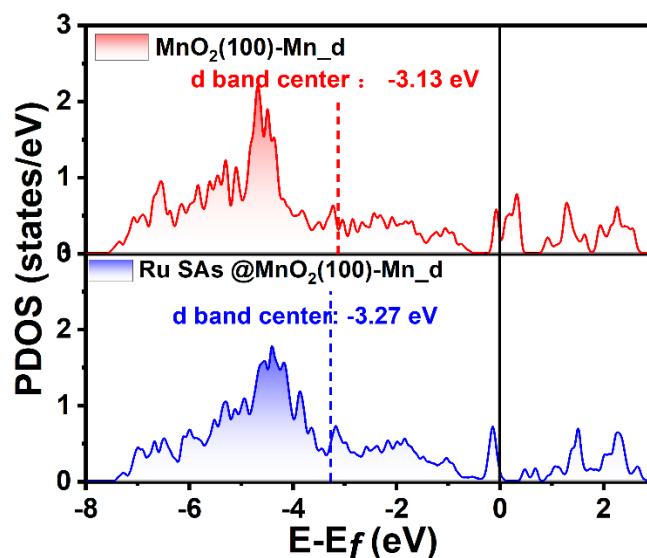

**Fig. S26** The PDOS and corresponding d-band centers of Mn 3d on the surface of MnO<sub>2</sub> (100) and Ru SAs@MnO<sub>2</sub> (100).

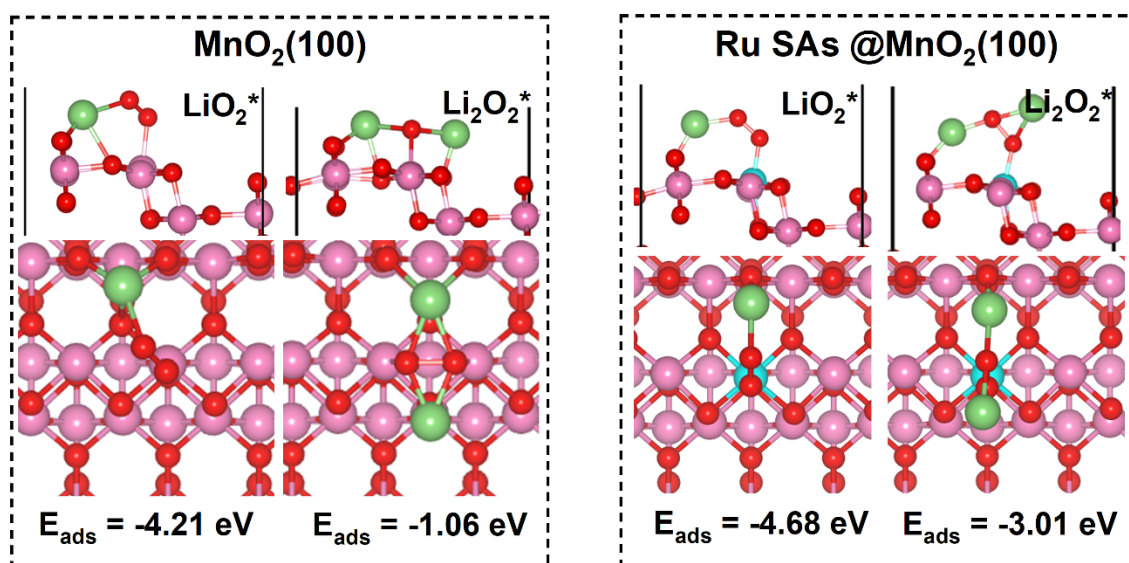

**Fig. S27** The adsorption energy of oxygenated species (LiO<sub>2</sub>\* and Li<sub>2</sub>O<sub>2</sub>\*) on MnO<sub>2</sub> (100) and Ru SAs@MnO<sub>2</sub> (100) and the corresponding adsorption configurations.

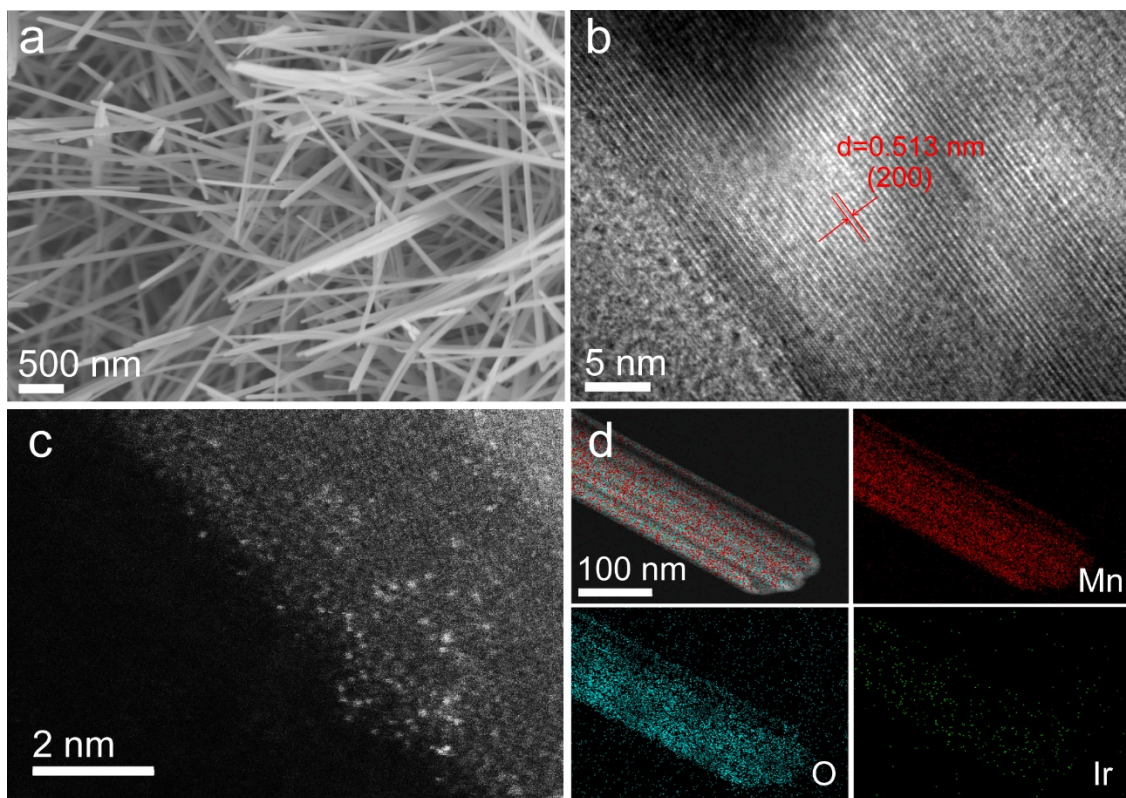

**Fig. S28** (a) SEM and (b) HR-TEM images of Ir SAs@MnO<sub>2</sub> nanowires. (c) Aberration-corrected HAADF-STEM image of Ir SAs@MnO<sub>2</sub>. (d) HAADF-STEM image of Ir SAs@MnO<sub>2</sub> and the corresponding EDX elemental mapping images.

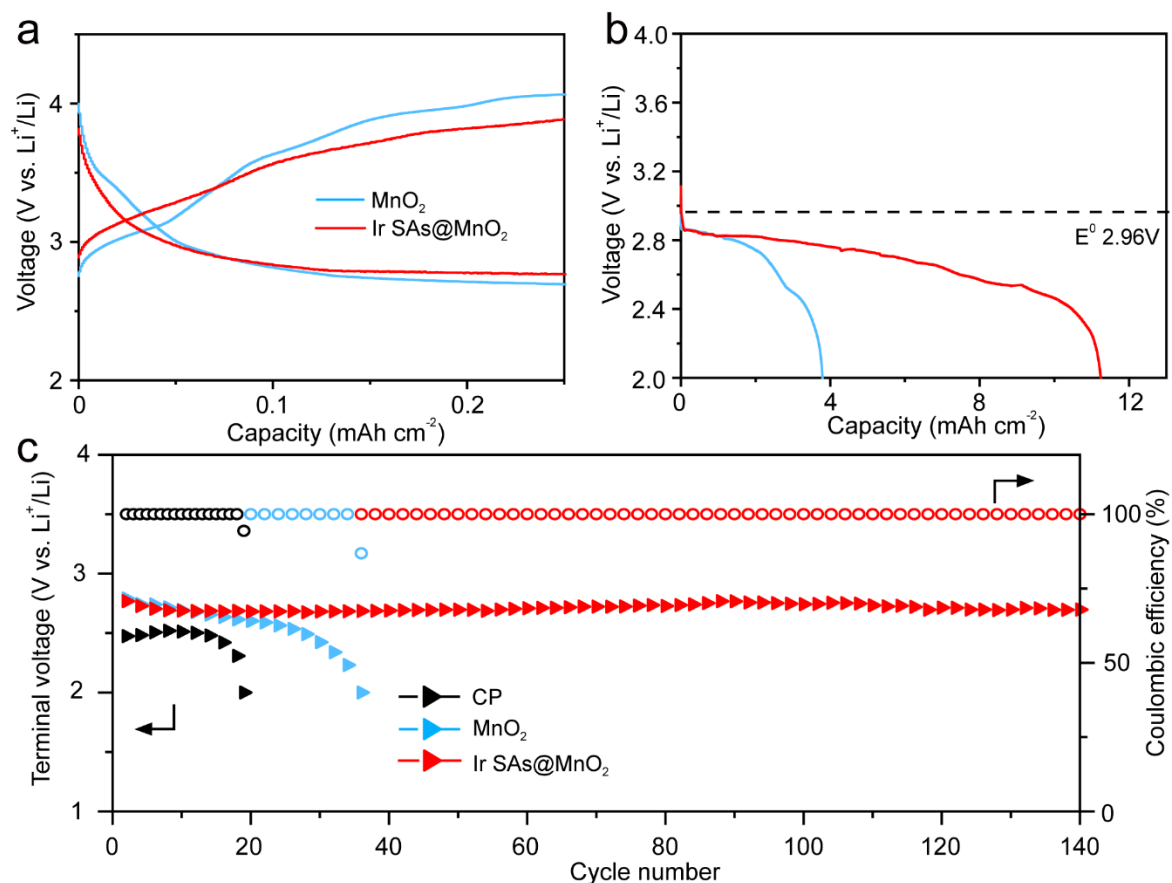

**Fig. S29** (a) The discharge–charge curves of  $\text{Ru SAs@MnO}_2$  and  $\text{MnO}_2$  electrodes at a curtailed capacity of  $0.25 \text{ mAh cm}^{-1}$  at a current density of  $0.05 \text{ mA cm}^{-2}$ . (b) The galvanostatic profiles for the  $\text{Ir SAs@MnO}_2$  and  $\text{MnO}_2$  electrodes under full discharging at  $0.05 \text{ mA cm}^{-2}$ . (c) Cycling performances of  $\text{Ir SAs@MnO}_2$ ,  $\text{MnO}_2$ , and CP electrodes collected at the current of  $0.05 \text{ mA cm}^{-2}$  with the cut-off capacity of  $0.25 \text{ mAh cm}^{-2}$ .

**Table S1.** The ICP-OES results of the Ru SAs@MnO<sub>2</sub> sample.

| Sample                  | Ru amount (wt.%) |
|-------------------------|------------------|
| Ru SAs@MnO <sub>2</sub> | 1.9              |

**Table S2.** EXAFS fitting parameters at the Ru K-edge for various samples ( $S_0^2=0.700$ )

| Sample                  | Shell | $N^a$   | $R(\text{\AA})^b$ | $\sigma^2(\text{\AA}^2)^c$ | $\Delta E_0(\text{eV})^d$ | $R$ factor |
|-------------------------|-------|---------|-------------------|----------------------------|---------------------------|------------|
| Ru foil-Refer           | Ru-Ru | 12      | 2.67±0.00         | 0.0030±0.0003              | -6.1±0.1                  | 0.0082     |
| RuO <sub>2</sub> -Refer | Ru-O  | 5.6±1.0 | 1.97±0.02         | 0.0016±0.0018              | -3.5±2.4                  | 0.0045     |
| Ru SAs@MnO <sub>2</sub> | Ru-O  | 5.0±2.3 | 2.02±0.04         | 0.0022±0.0060              | 2.8±5.4                   | 0.0051     |

<sup>a</sup> $N$ : coordination numbers; <sup>b</sup> $R$ : bond distance; <sup>c</sup> $\sigma^2$ : Debye-Waller factors; <sup>d</sup> $\Delta E_0$ : the inner potential correction.  $R$  factor: goodness of fit.  $S_0^2$  was set to 0.700, according to the experimental EXAFS fit of Ru foil reference by fixing coordination numbers as the known crystallographic value.

**Table S3.** The Mn 2p<sub>3/2</sub> XPS peak fitting parameters for Mn 2p<sub>3/2</sub> spectra.

| Samples                 | Binding energy<br>(2p <sub>3/2</sub> ) | Assignment       | FWHM | Area      | Area ratio of<br>Mn <sup>3+</sup> /Mn <sup>4+</sup> |
|-------------------------|----------------------------------------|------------------|------|-----------|-----------------------------------------------------|
| MnO <sub>2</sub>        | 641.90                                 | Mn <sup>3+</sup> | 1.70 | 18360.64  | 17.0%                                               |
|                         | 642.70                                 | Mn <sup>4+</sup> | 2.79 | 107728.30 |                                                     |
| Ru SAs@MnO <sub>2</sub> | 641.85                                 | Mn <sup>3+</sup> | 1.90 | 35315.90  | 64.2%                                               |
|                         | 642.65                                 | Mn <sup>4+</sup> | 2.80 | 54984.11  |                                                     |

**Table S4.** EXAFS fitting parameters at the Mn K-edge for various samples ( $S_0^2=0.850$ )

| Sample                  | Shell | $N^a$   | $R(\text{\AA})^b$ | $\sigma^2(\text{\AA}^2)^c$ | $\Delta E_0(\text{eV})^d$ | $R$ factor |
|-------------------------|-------|---------|-------------------|----------------------------|---------------------------|------------|
| MnO-Refer               | Mn-O  | 6       | 2.20±0.02         | 0.0085±0.0015              | -2.4±2.3                  | 0.0057     |
|                         | Mn-Mn | 12      | 3.13±0.01         | 0.0087±0.0005              | -5.5±1.1                  |            |
| MnO <sub>2</sub> -Refer | Mn-O  | 6.0     | 1.90±0.01         | 0.0065±0.0020              | -5.7±1.5                  | 0.0019     |
|                         | Mn-Mn | 4.0     | 2.88±0.01         | 0.0043±0.0028              | -9.7±2.1                  |            |
| MnO <sub>2</sub>        | Mn-O  | 5.7±1.1 | 1.90±0.01         | 0.0051±0.0024              | -5.2±3.1                  | 0.0018     |
|                         | Mn-Mn | 4.0±1.5 | 2.89±0.02         | 0.0033±0.0036              | -8.5±3.2                  |            |
| Ru                      | Mn-O  | 5.2±1.8 | 1.93±0.01         | 0.0048±0.0031              | -1.1±4.2                  | 0.0066     |
| SAs@MnO <sub>2</sub>    | Mn-Mn | 3.9±1.2 | 2.92±0.03         | 0.0043±0.0053              | -6.8±4.4                  |            |

<sup>a</sup> $N$ : coordination numbers; <sup>b</sup> $R$ : bond distance; <sup>c</sup> $\sigma^2$ : Debye-Waller factors; <sup>d</sup>  $\Delta E_0$ : the inner potential correction.  $R$  factor: goodness of fit.  $S_0^2$  was set to 0.850, according to the experimental EXAFS fit of MnO reference by fixing coordination numbers as the known crystallographic value.

**Table S5.** Comparison of the overpotentials and cycling stability between the Ru SAs@MnO<sub>2</sub> catalyst and other Mn-based and noble-metal-based catalysts in previous reports.

| Sample                  | Overpotentials                                   | Cycling stability                                                               | Ref.                                                                                                                                 |
|-------------------------|--------------------------------------------------|---------------------------------------------------------------------------------|--------------------------------------------------------------------------------------------------------------------------------------|
| Ru SAs@MnO <sub>2</sub> | 0.69 V at 0.05 mA cm <sup>-2</sup>               | 0.05 mA cm <sup>-2</sup> , 0.25 mAh cm <sup>-2</sup><br>for 180 cycles (1800 h) | This work                                                                                                                            |
| Mn-based                | selenate-anchored $\alpha$ -MnO <sub>2</sub>     | ~1.4 V at 200 mA g <sup>-1</sup>                                                | 4.2 V, 1000 mAh g <sup>-1</sup> for 70 cycles<br><i>Angew. Chem. Int. Ed.</i> 2018, <b>57</b> , 15984-15989                          |
|                         | $\beta$ -MnO <sub>2</sub> (100 facets)           | ~1.19 V at 0.05 mA cm <sup>-2</sup>                                             | / <i>J. Am. Chem. Soc.</i> 2019, <b>141</b> , 12832-12838.                                                                           |
|                         | Pd/ $\delta$ -MnO <sub>2</sub>                   | 0.65 V at 100 mA g <sup>-1</sup>                                                | 200 mA g <sup>-1</sup> , 1000 mAh g <sup>-1</sup> for 133 cycles (1330h) <i>Energy Storage Mater.</i> 2018, <b>12</b> , 8-16.        |
|                         | $\alpha$ -MnO <sub>2</sub> /RuO <sub>2</sub> @GN | 0.49 V at 100 mA g <sup>-1</sup>                                                | 100 mA g <sup>-1</sup> , 1000 mAh g <sup>-1</sup> for 45 cycles (900h) <i>ACS Catal.</i> 2018, <b>8</b> , 7983-7990                  |
| Noble-metal-based       | PtAu                                             | > 0.36 V at 100 mA g <sup>-1</sup>                                              | 500 mA g <sup>-1</sup> , 1000 mAh g <sup>-1</sup> for 220 cycles (> 850h) <i>Angew. Chem. Int. Ed.</i> 2022, <b>134</b> , e202201416 |
|                         | PtIr                                             | 0.44 V at 100 mA g <sup>-1</sup>                                                | 500 mA g <sup>-1</sup> , 1000 mAh g <sup>-1</sup> for 180 cycles (> 700h) <i>Angew. Chem. Int. Ed.</i> 2021, <b>60</b> , 26592-26598 |
|                         | Pd                                               | 0.2 V at 200 mA g <sup>-1</sup>                                                 | 200 mA g <sup>-1</sup> , 1000 mAh g <sup>-1</sup> for 70 cycles (700h) <i>ACS Catal.</i> 2018, <b>8</b> , 9006-9015                  |
|                         | PdNi                                             | 1.05 V at 300 mA g <sup>-1</sup>                                                | 300 mA g <sup>-1</sup> , 1000 mAh g <sup>-1</sup> for 67 cycles (450h) <i>J. Mater. Chem. A</i> 2018, <b>6</b> , 10856-10867         |



|                    |                                       |                                                                              |                                                                |
|--------------------|---------------------------------------|------------------------------------------------------------------------------|----------------------------------------------------------------|
| Pd/CNTs            | ~0.4 V at<br>0.05 mA cm <sup>-2</sup> | 0.05 mA cm <sup>-2</sup> , 0.5 mAh cm <sup>-2</sup><br>for 50 cycles (1000h) | <i>ACS Energy<br/>Lett.</i> 2019, <b>4</b> ,<br>2782-2786      |
| Pt <sub>3</sub> Co | 0.2 V at<br>100 mA g <sup>-1</sup>    | 100 mA g <sup>-1</sup> , 5000 mAh g <sup>-1</sup> for<br>300 cycles (3000h)  | <i>Energy Storage<br/>Mater.</i> 2020, <b>24</b> ,<br>707-713  |
| Ru SAs-NC          | 0.55 V at<br>0.02 mA cm <sup>-2</sup> | 0.02 mA cm <sup>-2</sup> , 1000 mAh g <sup>-1</sup><br>for 60 cycles         | <i>J. Am. Chem.<br/>Soc.</i> 2020, <b>142</b> ,<br>16776-16786 |

**Table S6.** d-band centre values of Mn atoms on MnO<sub>2</sub> (100) and Ru SAs@MnO<sub>2</sub> (100) surfaces.

| Atoms           | MnO <sub>2</sub> (100) | Ru SAs @MnO <sub>2</sub> (100) |
|-----------------|------------------------|--------------------------------|
| Mn <sub>1</sub> | -3.13 eV               | -3.27 eV                       |
| Mn <sub>2</sub> | -3.13 eV               | -3.27 eV                       |

Mn<sub>1</sub> and Mn<sub>2</sub> are the Mn atoms around the substituted Ru atom on MnO<sub>2</sub> (100) surface (Fig. S26).

**Table S7.** Bader Charge on the MnO<sub>2</sub> (100) and Ru SAs @MnO<sub>2</sub>(100) surfaces, respectively.

| Bader/ <i>e</i>               | Mn <sup>3+</sup> / <i>e</i> | Ru/ <i>e</i> |
|-------------------------------|-----------------------------|--------------|
| MnO <sub>2</sub> (100)        | -1.73                       | --           |
| Ru SAs@MnO <sub>2</sub> (100) | -1.71                       | -1.82        |

**Table S8.** ICOHP value of Mn-O and Ru-O bonds on the surfaces of MnO<sub>2</sub> (100) and Ru SAs@MnO<sub>2</sub>(100).

| ICOHP/eF | MnO <sub>2</sub> (100) | Ru SAs @MnO <sub>2</sub> (100) |
|----------|------------------------|--------------------------------|
| Mn-O     | -1.03                  | -1.10                          |
| Ru-O     | --                     | -2.21                          |

eF: Strength of the bond relative to the Fermi energy level;

## References

- [1] Y. Hu, G. Luo, L. Wang, X. Liu, Y. Qu, Y. Zhou, F. Zhou, Z. Li, Y. Li, T. Yao, *Adv. Energy Mater.* 2021, **11**, 2002816.
- [2] G. Meng, H. Tian, L. Peng, Z. Ma, Y. Chen, C. Chen, Z. Chang, X. Cui, J. Shi, *Nano Energy* 2021, **80**, 105531.
